# Supplementary material
Source: PubMed Central journal article supplement (PMC5775943)

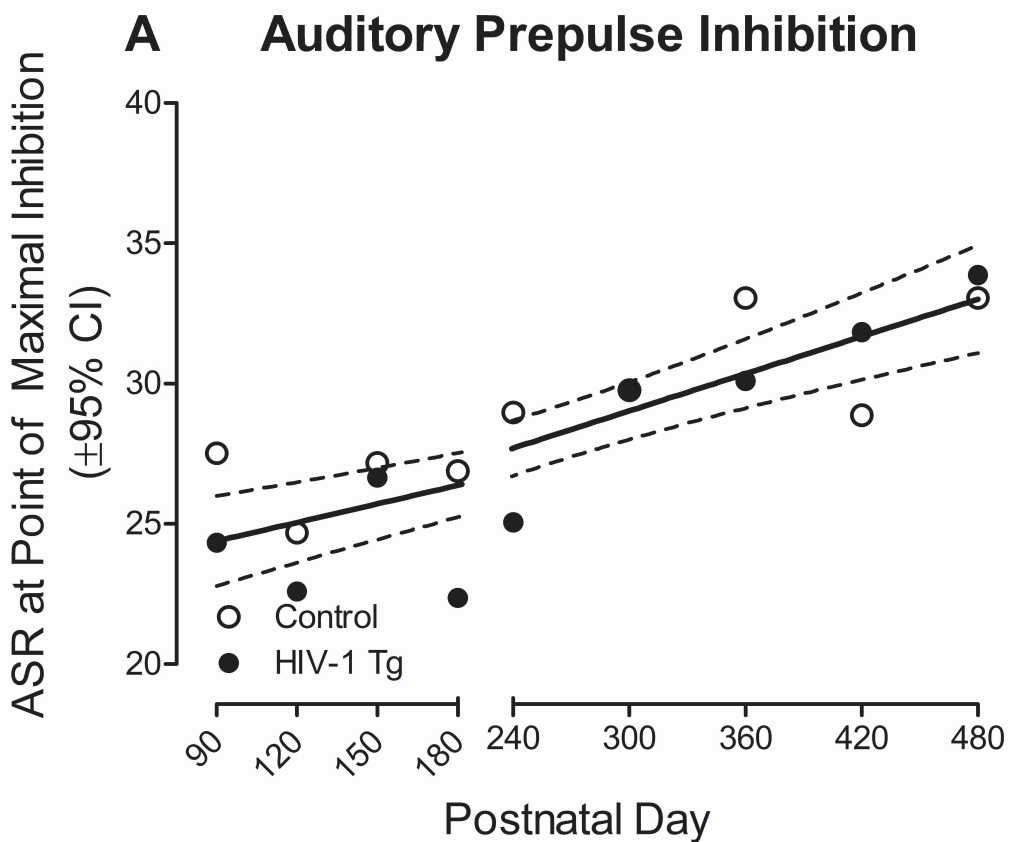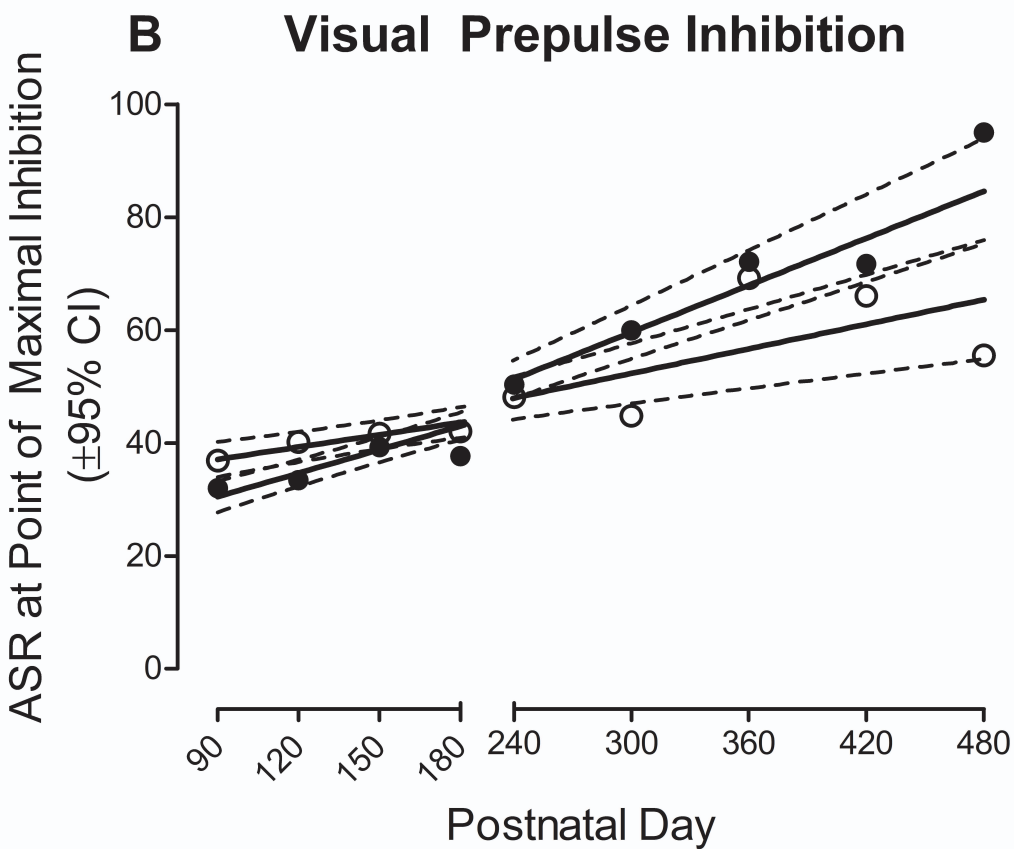

Supplement: NIHMS917009-supplement-Suppl_Fig_1.pdf [file NIHMS917009-supplement-Suppl_Fig_1.pdf]
